# Supplementary material for: A physics-based probabilistic forecasting model for rainfall-induced shallow landslides at regional scale
Source: Copernicus journal article supplement (doi:10.5194/nhess-2016-348), 2016-11-08
Supplement: Supplementary file [file nhess-2016-348-AC1-supplement.pdf]

Dear Davide Luciano:

Thanks a lot for your kind suggestion to our paper, and I think that your paper “Procedure to obtain analytical solutions of one dimensional Richards’ equation for infiltration in two-layered soils” is very impressive and interesting after carefully reading.

We think this paper is outstanding and suitable for our paper reference, and we will cite your paper if the authors get the revision chance.

Inspired by your paper, we will try to use your analytical solutions of one-dimensional Richards’ equation for comparing our numerical solution in the next following studies. Thanks again for your paper.
